# Supplementary material
Source: bioRxiv or medRxiv preprint supplement (https://medrxiv.org/highwire/filestream/89717/field_highwire_adjunct_files/1/2020.07.15.20154310-2.pdf)

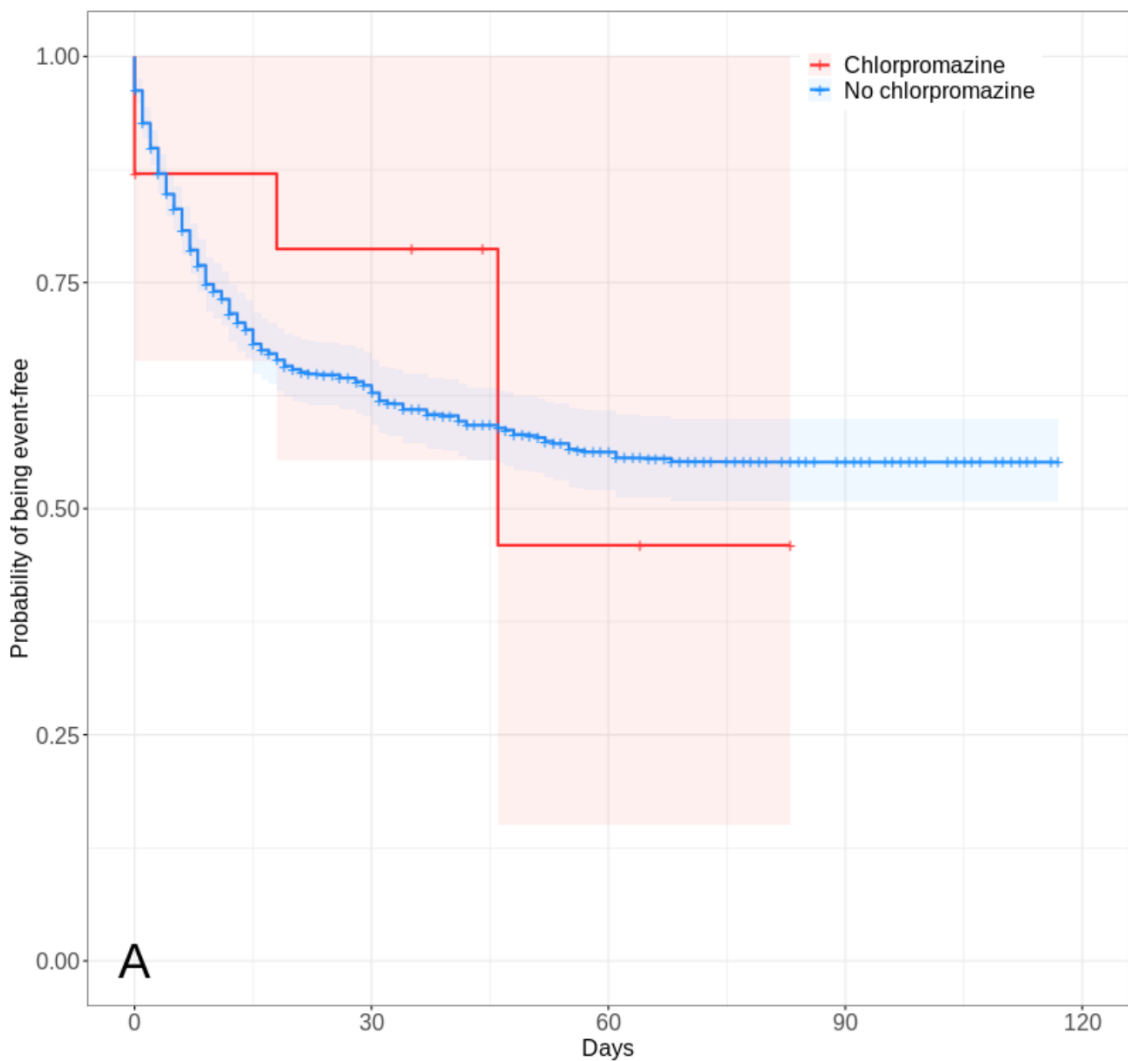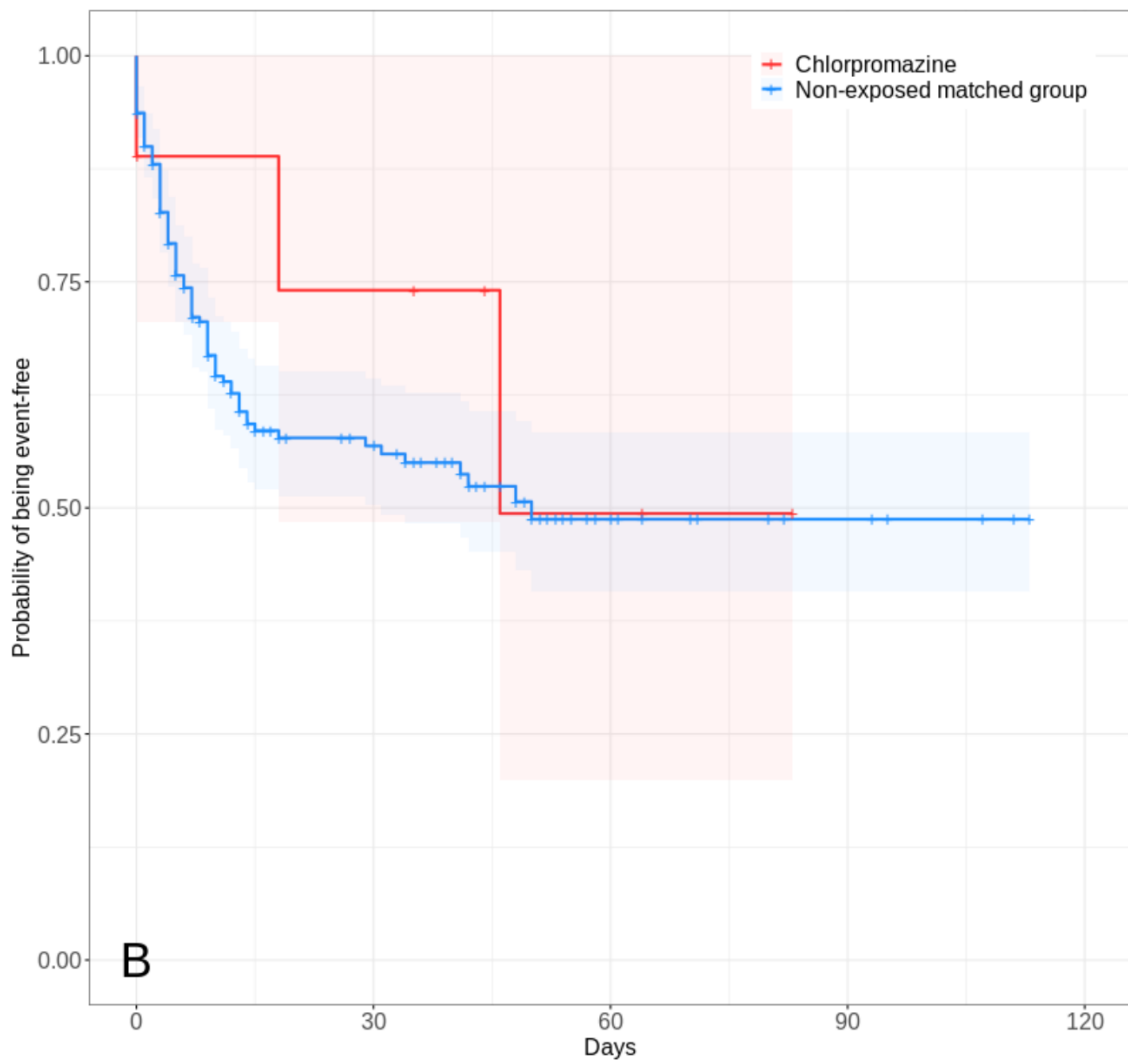

Supplement: Supplementary file [file 2020.07.15.20154310-2.pdf]
